# Supplementary material
Source: publisher figshare collection journal article supplement (https://karger.figshare.com/articles/dataset/_/16922938)
Supplement: Supplementary file 1 [file 1]

## MOOSE Checklist for Meta-analyses of Observational Studies

### The association between serum bilirubin and kernicterus spectrum disorder: A systematic review and meta-analysis

| Item No                                     | Recommendation                                                                                             | Reported on Page No                                                                                                   |
|---------------------------------------------|------------------------------------------------------------------------------------------------------------|-----------------------------------------------------------------------------------------------------------------------|
| Reporting of background should include      |                                                                                                            |                                                                                                                       |
| 1                                           | Problem definition                                                                                         | 4, Introduction paragraph 1                                                                                           |
| 2                                           | Hypothesis statement                                                                                       | N/A (objectives, 5, Introduction, paragraph 3)                                                                        |
| 3                                           | Description of study outcome(s)                                                                            | 6, Methods, paragraph 4                                                                                               |
| 4                                           | Type of exposure or intervention used                                                                      | 6, Methods, paragraph 3 (predictive factor)                                                                           |
| 5                                           | Type of study designs used                                                                                 | 5, Methods paragraph 1                                                                                                |
| 6                                           | Study population                                                                                           | 5, Methods, paragraph 1                                                                                               |
| Reporting of search strategy should include |                                                                                                            |                                                                                                                       |
| 7                                           | Qualifications of searchers (eg, librarians and investigators)                                             | 6, Methods, paragraph 5, Search strategies ("we" searched, indicating the investigators)                              |
| 8                                           | Search strategy, including time period included in the synthesis and key words                             | 6, Methods, paragraph 5, Search strategies                                                                            |
| 9                                           | Effort to include all available studies, including contact with authors                                    | 6, Methods, paragraph 5, Search strategies                                                                            |
| 10                                          | Databases and registries searched                                                                          | 6, Methods, paragraph 5, Search strategies                                                                            |
| 11                                          | Search software used, name and version, including special features used (eg, explosion)                    | Online supplement, Appendix 1, page 2-3                                                                               |
| 12                                          | Use of hand searching (eg, reference lists of obtained articles)                                           | 6, Methods, paragraph 5, Search strategies                                                                            |
| 13                                          | List of citations located and those excluded, including justification                                      | 8, Results, paragraph 1 and Appendix 4, citation of excluded shortlisted studies                                      |
| 14                                          | Method of addressing articles published in languages other than English                                    | N/A                                                                                                                   |
| 15                                          | Method of handling abstracts and unpublished studies                                                       | N/A                                                                                                                   |
| 16                                          | Description of any contact with authors                                                                    | 6, Methods, paragraph 5, Search strategies                                                                            |
| Reporting of methods should include         |                                                                                                            |                                                                                                                       |
| 17                                          | Description of relevance or appropriateness of studies assembled for assessing the hypothesis to be tested | 5-6, Methods, setting, population, predictive/prognostic factor, outcome; Appendix 2, Data extraction and management, |

|                                     |                                                                                                                                                                                                                                                                              |                                                                                                                              |
|-------------------------------------|------------------------------------------------------------------------------------------------------------------------------------------------------------------------------------------------------------------------------------------------------------------------------|------------------------------------------------------------------------------------------------------------------------------|
|                                     |                                                                                                                                                                                                                                                                              | Measures of association between the predictive or prognostic factor and the outcome                                          |
| 18                                  | Rationale for the selection and coding of data (eg, sound clinical principles or convenience)                                                                                                                                                                                | 6-7, Data analysis (following CHARMs checklist), Appendix 2, Data extraction and management                                  |
| 19                                  | Documentation of how data were classified and coded (eg, multiple raters, blinding and interrater reliability)                                                                                                                                                               | 6-7, Data analysis (following CHARMs checklist), Appendix 2, Data extraction and management                                  |
| 20                                  | Assessment of confounding (eg, comparability of cases and controls in studies where appropriate)                                                                                                                                                                             | 7, Risk of bias assessment, Methods, Data analysis, paragraph 3 and Appendix 2, Risk of bias assessment of included studies. |
| 21                                  | Assessment of study quality, including blinding of quality assessors, stratification or regression on possible predictors of study results                                                                                                                                   | 7, Risk of bias assessment, Methods, Data analysis, paragraph 3 and Appendix 2, Risk of bias assessment of included studies. |
| 22                                  | Assessment of heterogeneity                                                                                                                                                                                                                                                  | 7, Methods, Data analysis, paragraph 5 and Appendix 2, Dealing with heterogeneity                                            |
| 23                                  | Description of statistical methods (eg, complete description of fixed or random effects models, justification of whether the chosen models account for predictors of study results, dose-response models, or cumulative meta-analysis) in sufficient detail to be replicated | 7. Methods, Data analysis, paragraph 5 and Appendix 2, Data synthesis and meta-analysis approaches                           |
| 24                                  | Provision of appropriate tables and graphics                                                                                                                                                                                                                                 | Figures 1 (PRISMA), 2, 3 (RoB), 4 (Forest plot)                                                                              |
| Reporting of results should include |                                                                                                                                                                                                                                                                              |                                                                                                                              |
| 25                                  | Graphic summarizing individual study estimates and overall estimate                                                                                                                                                                                                          | Figure 4 (Forest Plot of main analysis)                                                                                      |
| 26                                  | Table giving descriptive information for each study included                                                                                                                                                                                                                 | Table 1                                                                                                                      |
| 27                                  | Results of sensitivity testing (eg, subgroup analysis)                                                                                                                                                                                                                       | N/A                                                                                                                          |
| 28                                  | Indication of statistical uncertainty of findings                                                                                                                                                                                                                            | 95 % CI included in all estimates.                                                                                           |

| Item No                                | Recommendation                                         | Reported on Page No |
|----------------------------------------|--------------------------------------------------------|---------------------|
| Reporting of discussion should include |                                                        |                     |
| 29                                     | Quantitative assessment of bias (eg, publication bias) | 12, Discussion,     |

|                                         |                                                                                                                           |                                                                                                                          |
|-----------------------------------------|---------------------------------------------------------------------------------------------------------------------------|--------------------------------------------------------------------------------------------------------------------------|
|                                         |                                                                                                                           | paragraph 2;<br>page 12,<br>Discussion,<br>paragraph 4<br>and Appendix<br>6, GRADE<br>certainty of<br>evidence<br>rating |
| 30                                      | Justification for exclusion (eg, exclusion of non-English language citations)                                             | N/A                                                                                                                      |
| 31                                      | Assessment of quality of included studies                                                                                 | 3, Abstract,<br>Results,<br>paragraph 1;<br>11-12,<br>Results, RoB<br>of included<br>studies.                            |
| Reporting of conclusions should include |                                                                                                                           |                                                                                                                          |
| 32                                      | Consideration of alternative explanations for observed results                                                            | 12,<br>Discussion,<br>paragraph 1-<br>2 and 14,<br>Conclusions                                                           |
| 33                                      | Generalization of the conclusions (ie, appropriate for the data presented and within the domain of the literature review) | 4, Abstract,<br>Interpretation,<br>14,<br>Conclusions                                                                    |
| 34                                      | Guidelines for future research                                                                                            | 14,<br>Conclusions                                                                                                       |
| 35                                      | Disclosure of funding source                                                                                              | 4, Abstract,<br>funding, 7,<br>Methods,<br>paragraph<br>10.                                                              |

From: Stroup DF, Berlin JA, Morton SC, et al, for the Meta-analysis Of Observational Studies in Epidemiology (MOOSE) Group. Meta-analysis of Observational Studies in Epidemiology. A Proposal for Reporting. *JAMA*. 2000;283(15):2008-2012. doi: 10.1001/jama.283.15.2008.
